# Supplementary figures and images for: Systematic Review of the Impact of Behavioral Health Homes on Cardiometabolic Risk Factors for Adults With Serious Mental Illness
Source: Atypon-hosted journal article supplement (doi:10.1176/appi.ps.201800563), 2019-09-10

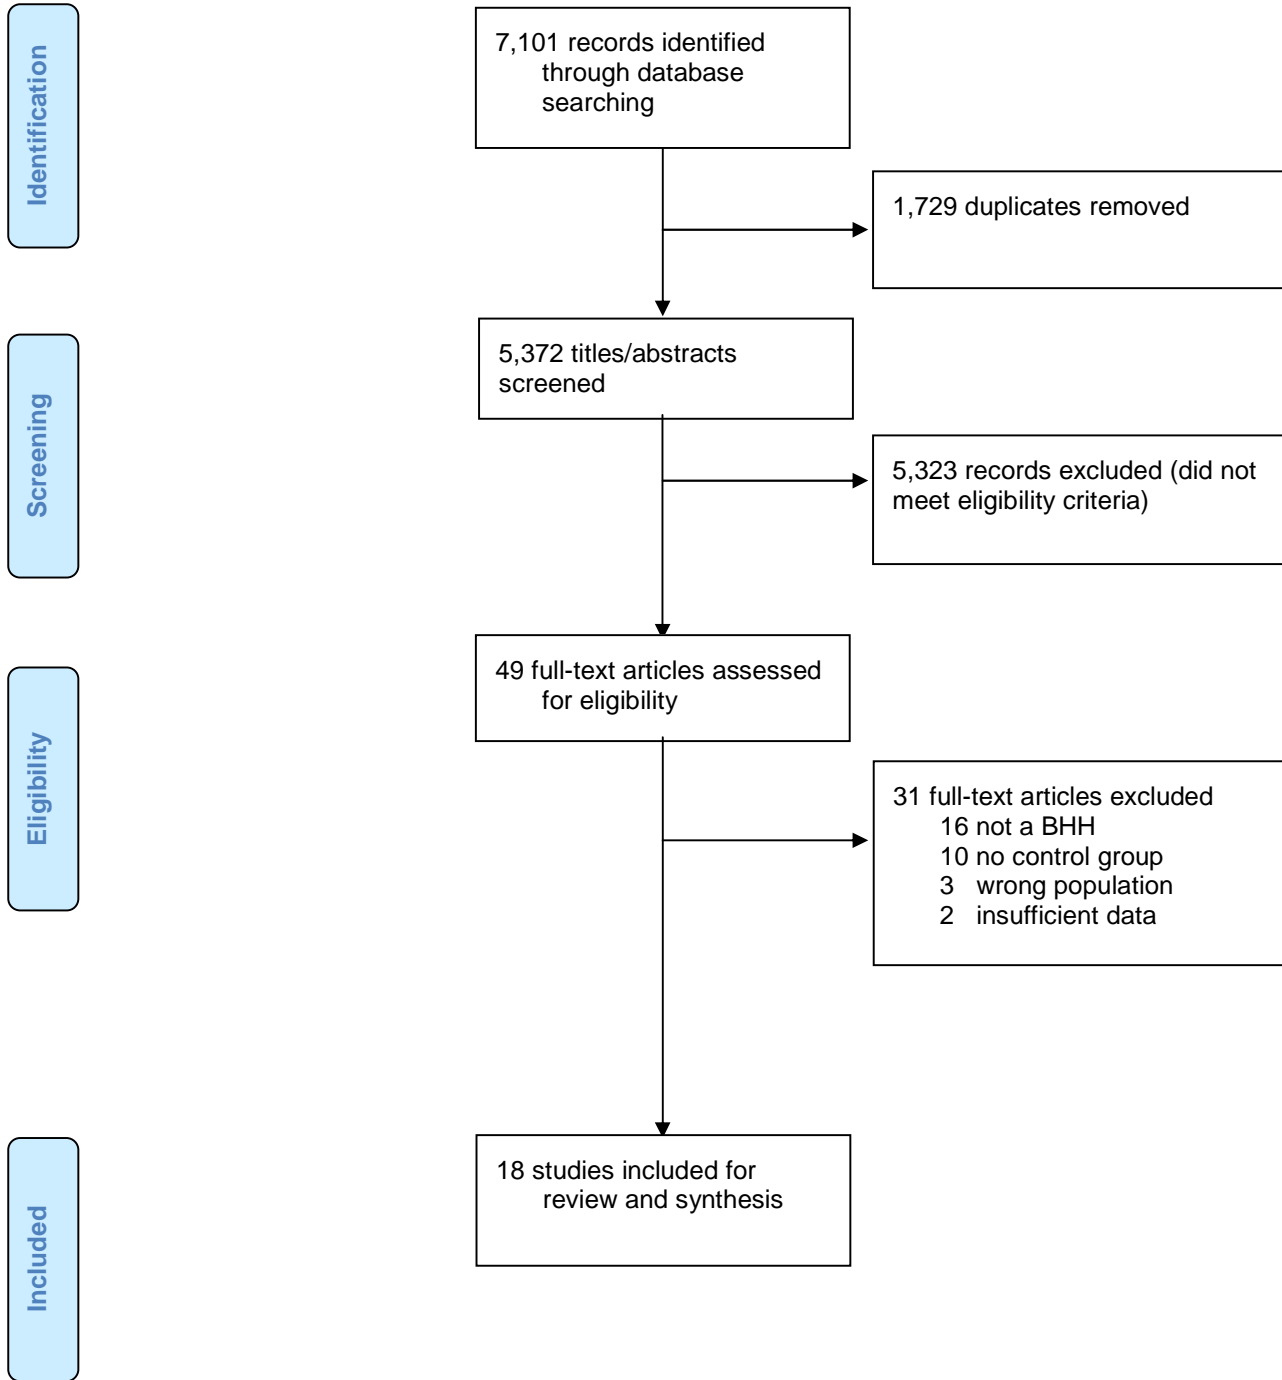

Figure 1. PRISMA flow diagram of studies included in the review

Supplement: appi.ps.201800563.ds001.pdf [file appi.ps.201800563.ds001.pdf]
